# Supplementary material
Source: PubMed Central journal article supplement (PMC4962639)
Supplement: IAI.00197-16_zii999091773so1.pdf [file IAI.00197-16_zii999091773so1.pdf]

# Supplementary Figure 1

A

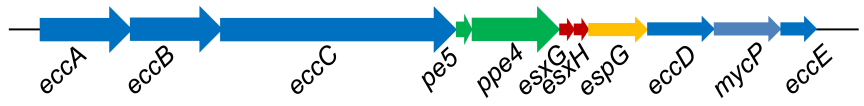

B

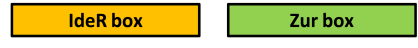

Mtb *rv0282* upstream sequence:

```

1 cccgggctc cataatgaaaa tcattgttcagtaagc acac tctgcataatcgggctaccaa cgaaatggagtacgggtcat
81 gatcttgccagccgtgccta aaagcttggccgcagggccg agtcgattggtcgcggtcgc ctcgacac ttagcttatgca
161 atgctaatttcggggcaag ttcaggcgatcggccg ATG GCG
  
```

Msmeg *msmeg0615* upstream sequence:

```

1 cagtacagtcctgatgtggg cccgcaaggggtgagccgct tcacggcccagagccccac gtgcgctctcgacag ttaact
81 tatgtaatgctaacttctcg aaagttagcttaggcataca taaggagagagggcggggc gtgcgctcccgcgcacgcat
161 atgggaagtgcacgcttgc ggetccgcctcagggagcgc cccgggtcgaccgcgat GTG GTC
  
```

C

```

Mtb: ttagcttatgcaatgctaa
    |||*|||*|||*|||*|||
Msmeg: ttaacttatgtaatgctaa
  
```

## Supplementary Figure 1. Comparison of the *esx3* Locus in Mtb and Msmeg

(A) The *esx3* locus spans from *eccA*<sub>3</sub> (*Rv0282*) to *eccE*<sub>3</sub> (*Rv0292*) in Mtb, and *eccA*<sub>3</sub> (*msmeg0615*) to *eccE*<sub>3</sub> (*msmeg0625*) in Msmeg. (B) Upstream promoter regions from *esx3*<sub>Mtb</sub> and *esx3*<sub>Msmeg</sub>; IdeR (orange) and Zur (green) recognition sites are indicated. The beginning of the protein coding sequence is in bold. (C) Nucleotide alignment of IdeR boxes from Mtb and Msmeg.

| <b>Supplementary Table 1. Primers Used</b> |                                                                                                                  |
|--------------------------------------------|------------------------------------------------------------------------------------------------------------------|
| <b>Name</b>                                | <b>Sequence</b>                                                                                                  |
| TBEsx3JMF                                  | AAC ATG AGG CCC TGC AGG AAC ACG GTC ATC CGC<br>CGC AGA TAG TCC AAC TGG GAA CTG GCG CAG TTC<br>CTC                |
| TBEsx3JMR                                  | CAT CGC TCG TTG TAG ACC AGT TGA AAA AAC GGG<br>TGC TCC TCG GCT CCC TCC TCC ATA TGC ACT GAG<br>CGT CAG            |
| Int-Ab-F                                   | CTA AGG AAG CTA AAA TGG AGA AAA AAA TCA CTG GAT<br>ATA CCA CCG TTG ATA TAT CCC AAT GGT CTG ACG CTC<br>AGT GGA AC |
| Int-Ab-R                                   | GCC CAT GGT GAA AAC GGG GGC GAA GAA GTT GTC<br>CAT ATT GGC CAC GTT TAA ATC AAA ACT GTA CGA TCG<br>ACT GCC AGG C  |
| <i>TB esxG-F</i>                           | TAT CCC ACA GTT GGT GGC CT                                                                                       |
| <i>TB esxG-R</i>                           | GAC TCC CCC TGG TGA AAC G                                                                                        |
| <i>TB ppe4-F</i>                           | TGG CTC TTA GCG TTG CTT CA                                                                                       |
| <i>TB ppe4-R</i>                           | CGT GAG GAA GGC GAT GAT GA                                                                                       |
| <i>TB mbtI-F</i>                           | TTC TGT CCC GTT GTG TCG AA                                                                                       |
| <i>TB mbtI-R</i>                           | CTG TAA CCC AGA GCA CGG AT                                                                                       |
| <i>TB bfrB-F</i>                           | TAA CGA ATT CAC AGC GGC AC                                                                                       |
| <i>TB bfrB-R</i>                           | CGA CCG CTT GGC TGT AAA AA                                                                                       |
| <i>TB 16S-F</i>                            | TCG TGT CGT GAG ATG TTG GG                                                                                       |
| <i>TB 16S-R</i>                            | TAG CAT GTG TGA AGC CCT GG                                                                                       |
| <i>Smeg esxG-F</i>                         | TCT TCT CGA CGC TCA CAT CC                                                                                       |
| <i>Smeg esxG-R</i>                         | GGA AGG CCT GCG AAC TCA T                                                                                        |
| <i>Smeg mbtI-F</i>                         | CCG GTA TCG AGA CTG CAT CC                                                                                       |
| <i>Smeg mbtI-R</i>                         | GTA GAC GAC GTA CTC CTC GC                                                                                       |
| <i>Smeg bfrB-F</i>                         | ACG AAA TTC CAC GCC CTC AT                                                                                       |
| <i>Smeg bfrB-R</i>                         | TAG AAG TGC TTG GCG AGC TG                                                                                       |
| <i>Smeg dnaA-F</i>                         | CCG GGT ATG CGT GTC AAG TA                                                                                       |
| <i>Smeg dnaA-R</i>                         | AGA ACT CCT CCT GGA TGC CT                                                                                       |
